# Supplementary material for: The Exploration of Fetal Growth Restriction Based on Metabolomics: A Systematic Review
Source: MDPI journal article supplement (doi:10.3390/metabo12090860), 2022-09-13
Supplement: s1 [file s1]

**Table S1 Results of the Pathway Analysis of Human Neonatal Studies**

| Pathway name                                        | Total | Hits | Raw p   | Holm adjust | FDR       | Impact  |
|-----------------------------------------------------|-------|------|---------|-------------|-----------|---------|
| Aminoacyl-tRNA biosynthesis                         | 48    | 17   | 0.00000 | 0.00000     | 5.15E-14  | 0.00000 |
| Valine, leucine and isoleucine biosynthesis         | 8     | 4    | 0.00004 | 0.00332     | 0.0016782 | 0.00000 |
| Glyoxylate and dicarboxylate metabolism             | 32    | 6    | 0.00022 | 0.01795     | 0.0061293 | 0.13757 |
| Arginine biosynthesis                               | 14    | 4    | 0.00050 | 0.04071     | 0.0098223 | 0.42132 |
| Arginine and proline metabolism                     | 38    | 6    | 0.00058 | 0.04677     | 0.0098223 | 0.29477 |
| Alanine, aspartate and glutamate metabolism         | 28    | 5    | 0.00098 | 0.07759     | 0.01375   | 0.31090 |
| Phenylalanine, tyrosine and tryptophan biosynthesis | 4     | 2    | 0.00477 | 0.37180     | 0.0572    | 1.00000 |
| Synthesis and degradation of ketone bodies          | 5     | 2    | 0.00780 | 0.60043     | 0.076095  | 0.60000 |
| Butanoate metabolism                                | 15    | 3    | 0.00815 | 0.61963     | 0.076095  | 0.11111 |
| Nitrogen metabolism                                 | 6     | 2    | 0.01148 | 0.86110     | 0.087676  | 0.00000 |
| D-Glutamine and D-glutamate metabolism              | 6     | 2    | 0.01148 | 0.86110     | 0.087676  | 0.50000 |
| Glycine, serine and threonine metabolism            | 33    | 4    | 0.01372 | 1.00000     | 0.096009  | 0.24577 |
| Valine, leucine and isoleucine degradation          | 40    | 4    | 0.02642 | 1.00000     | 0.17073   | 0.00000 |
| Tyrosine metabolism                                 | 42    | 4    | 0.03103 | 1.00000     | 0.17913   | 0.38029 |
| Phenylalanine metabolism                            | 10    | 2    | 0.03199 | 1.00000     | 0.17913   | 0.35714 |
| Glutathione metabolism                              | 28    | 3    | 0.04514 | 1.00000     | 0.23696   | 0.10839 |

**Table S2 Results of the Pathway Analysis of Human Maternal Studies**

| Pathway name                                        | Total | Hits | Raw p   | Holm adjust | FDR     | Impact  |
|-----------------------------------------------------|-------|------|---------|-------------|---------|---------|
| Aminoacyl-tRNA biosynthesis                         | 48    | 16   | 0.00000 | 0.00000     | 0.00000 | 0.00000 |
| Valine, leucine and isoleucine biosynthesis         | 8     | 6    | 0.00000 | 0.00004     | 0.00002 | 0.00000 |
| Glutathione metabolism                              | 28    | 7    | 0.00040 | 0.03267     | 0.00897 | 0.38582 |
| Arginine biosynthesis                               | 14    | 5    | 0.00048 | 0.03853     | 0.00897 | 0.25380 |
| Arginine and proline metabolism                     | 38    | 8    | 0.00053 | 0.04271     | 0.00897 | 0.53597 |
| Glyoxylate and dicarboxylate metabolism             | 32    | 7    | 0.00095 | 0.07543     | 0.01337 | 0.13757 |
| Alanine, aspartate and glutamate metabolism         | 28    | 6    | 0.00253 | 0.19697     | 0.03030 | 0.53446 |
| Glycine, serine and threonine metabolism            | 33    | 6    | 0.00602 | 0.46326     | 0.06317 | 0.33870 |
| Glycerophospholipid metabolism                      | 36    | 6    | 0.00933 | 0.70904     | 0.08708 | 0.29964 |
| Phenylalanine, tyrosine and tryptophan biosynthesis | 4     | 2    | 0.01511 | 1.00000     | 0.12695 | 1.00000 |
| Synthesis and degradation of ketone bodies          | 5     | 2    | 0.02434 | 1.00000     | 0.18585 | 0.60000 |
| D-Glutamine and D-glutamate metabolism              | 6     | 2    | 0.03528 | 1.00000     | 0.22796 | 0.50000 |
| Nitrogen metabolism                                 | 6     | 2    | 0.03528 | 1.00000     | 0.22796 | 0.00000 |
| Butanoate metabolism                                | 15    | 3    | 0.03969 | 1.00000     | 0.23812 | 0.11111 |
| Glycolysis / Gluconeogenesis                        | 26    | 4    | 0.04299 | 1.00000     | 0.24073 | 0.12971 |
| Histidine metabolism                                | 16    | 3    | 0.04705 | 1.00000     | 0.24700 | 0.09016 |
